# Supplementary material for: Follicle-Stimulating Hormone Alleviates Ovarian Aging by Modulating Mitophagy- and Glycophagy-Based Energy Metabolism in Hens
Source: MDPI journal article supplement (doi:10.3390/cells11203270), 2022-10-18
Supplement: s1 [file s1]

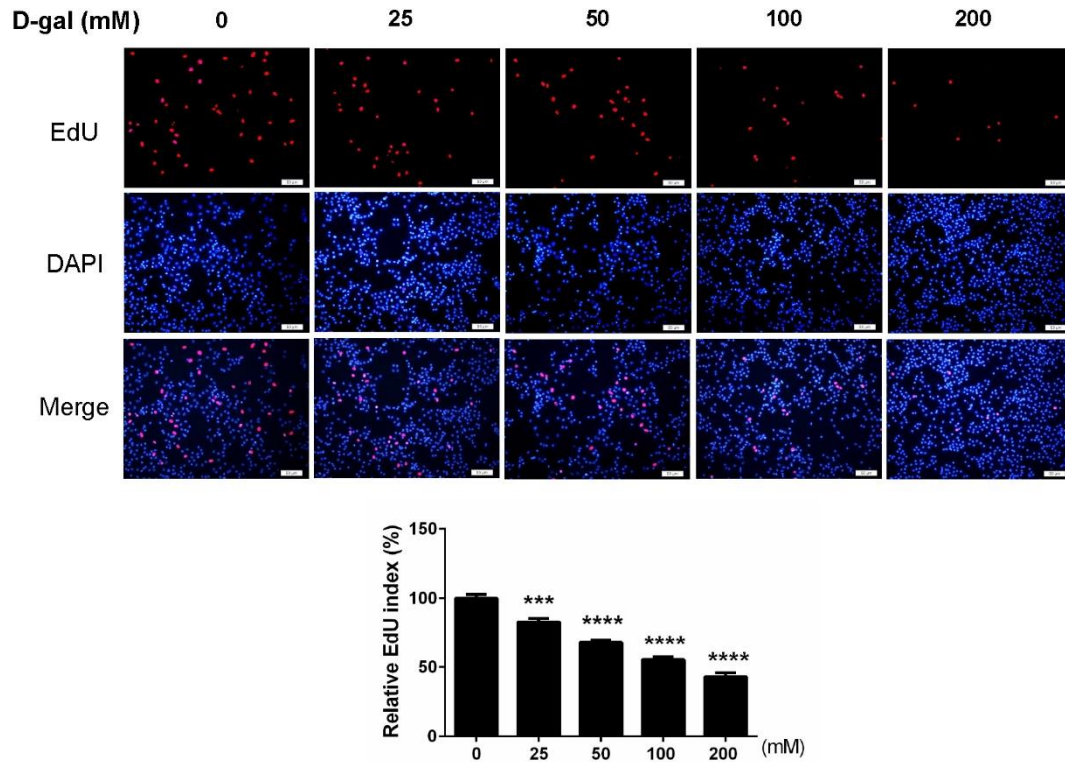

**Figure S1: The effect of D-gal on cell proliferation in SYF-GCs of D280 hens.** EdU labeled-proliferative GCs from control and D-gal-treated groups with different concentrations (0, 25, 50, 100, 200 mM). Scale bar: 50  $\mu$ m. \*\*\* $P < 0.001$ , which represents the difference between the groups in which the GCs were treated with D-gal of different concentrations for 24 h compared to control.

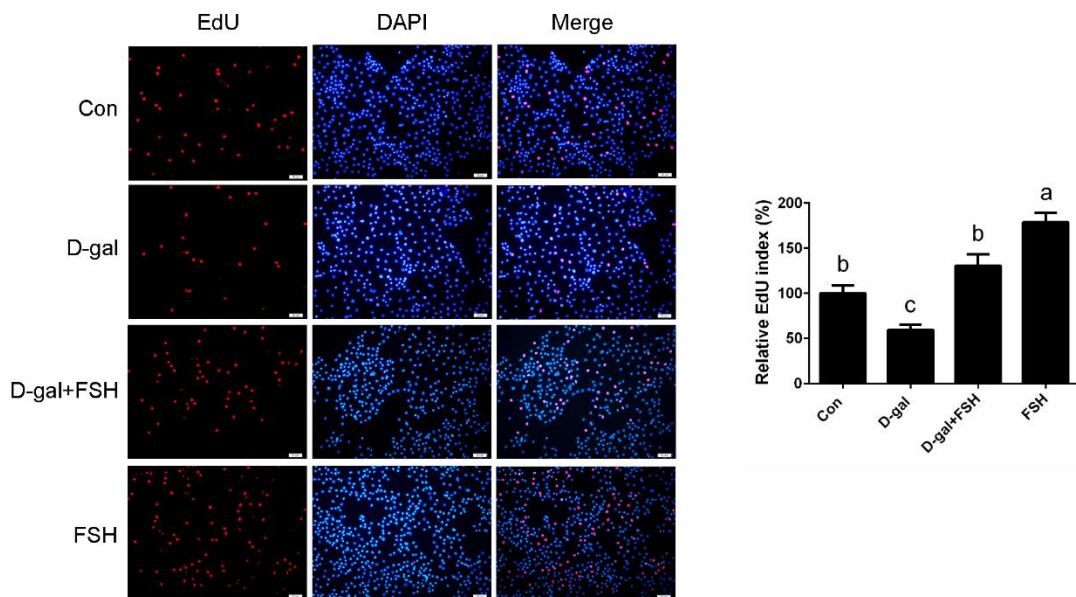

**Figure S2: The effect of FSH on cell proliferation in D-gal-induced senescent GCs.** SYF-GCs

of D280 hens were cultured with D-gal (200 mM) for 24 h, and then incubated with FSH (0.01 IU/mL) for another 24 h. EdU assay in GCs from the control GCs, senescent GCs (treated with 200 mM D-gal for 24 h), senescent GCs (treated with 200 mM D-gal for 24 h) with FSH treatment (0.01 IU/mL for another 24 h), and FSH treatment alone GCs (0.01 IU/mL). Scale bar: 50  $\mu$ m. Different lowercase indicated significant differences ( $P < 0.05$ ).
